# Supplementary material
Source: Springer Nature journal article supplement (https://www.springermedizin.de/resource/supplementary/12947_2010_372_MOESM5_ESM.pdf/9556828)

**A**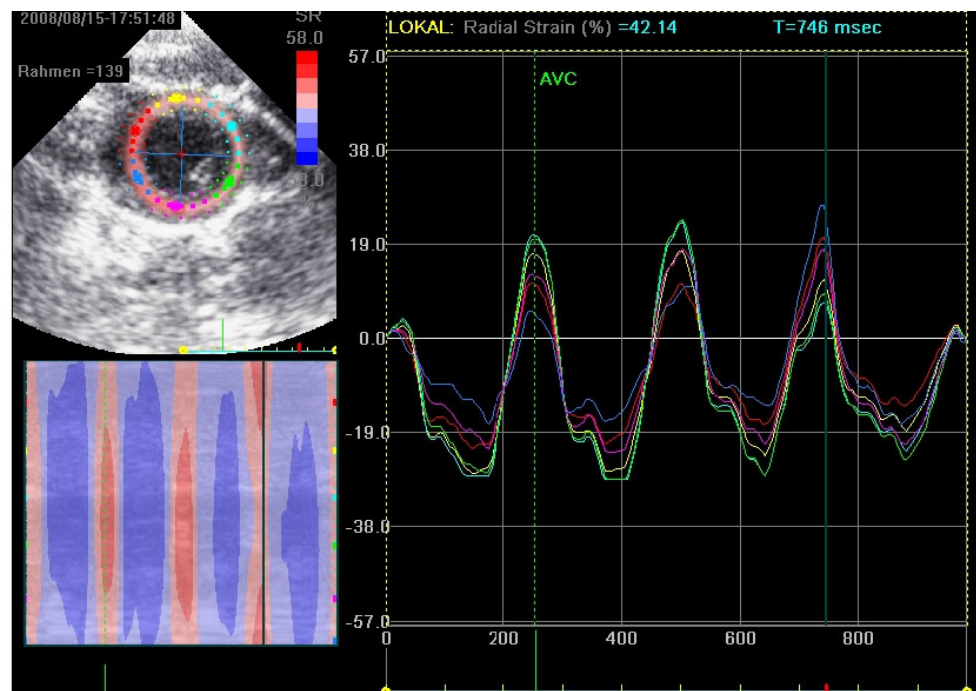**B**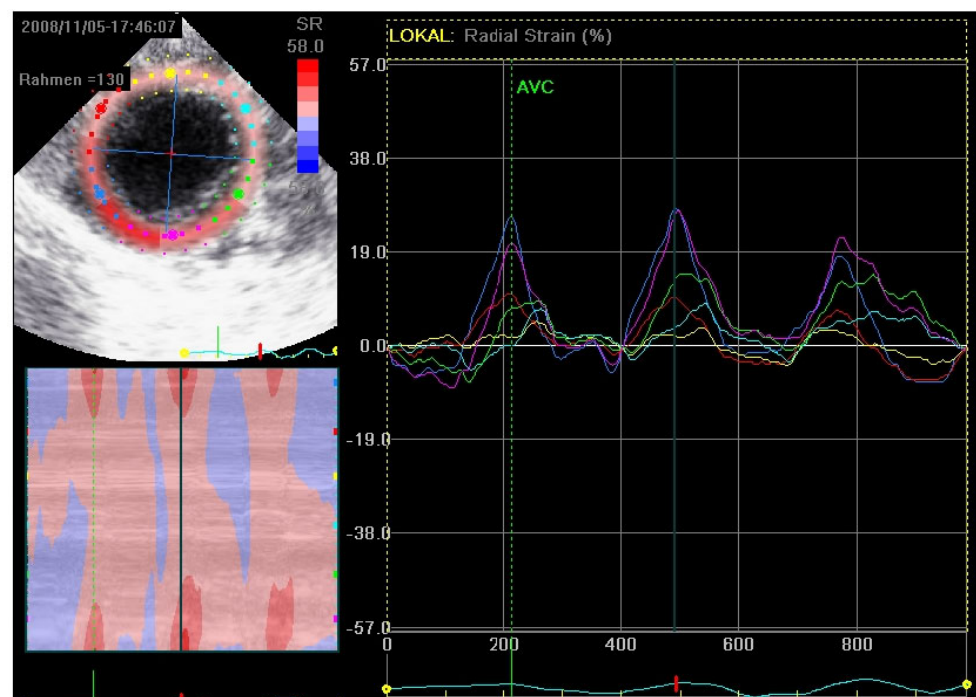

Supplement: MOESM5 [file 9556828]
